# Supplementary material for: Toxicity, Pharmacokinetics, and Gut Microbiome of Oral Administration of Sesterterpene MHO7 Derived from a Marine Fungus
Source: MDPI journal article supplement (doi:10.3390/md17120667), 2019-11-26
Supplement: s1 [file s1]

# Toxicity, Pharmacokinetics, and Gut microbiome of Oral Administration of Sesterterpene MHO7 Derived from a Marine Fungus

Wei Tian, Liang Yang, Di Wu, Zixin Deng and Kui Hong \*

Key Laboratory of Combinatorial Biosynthesis and Drug Discovery, Ministry of Education, and Wuhan University School of Pharmaceutical Sciences, Wuhan University, Wuhan 430071, China;  
twwtss@163.com (W.T.); [liangy@whu.edu.cn](mailto:liangy@whu.edu.cn) (L.Y.); [diwu0301@163.com](mailto:diwu0301@163.com) (D.W.); zxdeng@whu.edu.cn (Z.D.)

\* Correspondence: [kuihong31@whu.edu.cn](mailto:kuihong31@whu.edu.cn); Tel.: +86-27-6875-2442

Received: date; Accepted: date Published: date

## Supplementary Information

**Table S1.** Intra-day and inter-day precision and accuracy of HPLC method

**Table S2.** Log P and Log D values of MHO7 in different time and pH condition at 37 °C.

**Table S3.** Log P value of MHO7 in different time at 25 °C.

**Table S4.** Method validation of MHO7 for *in vitro* incubation system

**Table S5.** Weight of mice organs in acute toxicity test

**Table S6.** Method validation of MHO7 in plasma

**Table S7.** Method validation of MHO7 in tissues

**Table S8.** The concentration of MHO7 in mice tissues

**Table S9.** The tissue-to-plasma ratio of MHO7 in different time

**Table S10.** Significant different phyla between control and treatment groups

**Table S11.** Significant different classes between control and treatment groups

**Table S12.** Significant different orders between control and treatment groups

**Table S13.** Significant different families between control and treatment groups

**Table S14.** Significant different genera between control and treatment groups

**Figure S1.** Specificity of MHO7 *in vitro* incubation system

**Figure S2.** Body weight changes of female and male mice within 14 days

**Figure S3.** Specificity of MHO7 in plasma

**Figure S4.** Specificity of MHO7 in tissues

**Figure S5.** Rarefaction and Shannon index curves of OTU level

**Figure S6.** LDA score by Linear Discriminant Analysis (LDA) Effect Size (LefSe) analysis

**Figure S7.** MHO7 modulated the composition of gut microbiota at the different taxonomic levels

**Table S1.** Intra-day and inter-day precision and accuracy of HPLC method

| Concentration (mM) | Inter-day Precision (RSD, %) | Intra-day Precision (RSD, %) | Accuracy (%) |
|--------------------|------------------------------|------------------------------|--------------|
| 1                  | 0.17                         | 0.10                         | 101.01±0.10  |
| 0.1                | 0.21                         | 1.33                         | 100.48±1.33  |
| 0.01               | 0.87                         | 0.76                         | 99.88±0.76   |

**Table S2.** Log P and Log D values of MHO7 in different time and pH condition at 37 °C.

| Time (h) | Log P/D Value |              |              |              |
|----------|---------------|--------------|--------------|--------------|
|          | O/P (pH 1.5)  | O/P (pH 5.0) | O/P (pH 7.4) | O/W (pH 7.0) |
| 4        | 1.29 ±0.02    | 1.15 ±0.02   | 1.39 ±0.03   | 2.55 ±0.01   |
| 8        | 1.22 ±0.04    | 1.03 ±0.05   | 1.37 ±0.05   | 2.51 ±0.04   |
| 12       | 1.13 ±0.03    | 0.95 ±0.03   | 1.31 ±0.03   | 2.48 ±0.02   |
| 24       | 1.13 ±0.02    | 0.95 ±0.04   | 1.29 ±0.02   | 2.49 ±0.02   |
| 30       | 1.12 ±0.15    | 0.95 ±0.03   | 1.27 ±0.04   | 2.47 ±0.01   |
| 36       | 1.12 ±0.03    | 0.93 ±0.03   | 1.26 ±0.05   | 2.49 ±0.03   |
| 48       | 1.12 ±0.03    | 0.93 ±0.02   | 1.26 ±0.01   | 2.48 ±0.03   |

O, means octanol; P, means PBS; W, means ddH<sub>2</sub>O.

**Table S3.** Log P value of MHO7 in different time at 25 °C.

| Time (h) | Log P Value |
|----------|-------------|
| 4        | 1.23 ±0.02  |
| 8        | 1.22 ±0.04  |
| 12       | 1.23 ±0.03  |
| 24       | 1.23 ±0.02  |
| 30       | 1.27 ±0.15  |
| 36       | 1.27 ±0.03  |
| 48       | 1.29 ±0.05  |

**Table S4.** Method validation of MHO7 *in vitro* incubation system

| Concentration (mM)                                   | HQC              | MQC              | LQC              |
|------------------------------------------------------|------------------|------------------|------------------|
| Inter-day Precision (RSD, %)                         | 4.97             | 3.34             | 7.36             |
| Intra-day Precision (RSD, %)                         | 6.42             | 7.24             | 7.95             |
| Inter-day Accuracy (%)                               | 97.35            | 98.66            | 101.86           |
| Intra-day Accuracy (%)                               | 96.42            | 95.70            | 97.26            |
| Matrix effect (%; mean $\pm$ SD)                     | 91.45 $\pm$ 3.23 | 95.77 $\pm$ 2.98 | 95.24 $\pm$ 4.31 |
| Recovery (%; mean $\pm$ SD)                          | 98.99 $\pm$ 1.08 | 99.24 $\pm$ 2.02 | 97.65 $\pm$ 1.36 |
| 1 freeze-thaw cycles Precision (RSD, %)              | 2.22             | 2.15             | 3.53             |
| 2 freeze-thaw cycles Precision (RSD, %)              | 2.36             | 2.89             | 3.77             |
| 3 freeze-thaw cycles Precision (RSD, %)              | 5.87             | 2.56             | 4.44             |
| 1 freeze-thaw cycles Accuracy (%)                    | 98.87            | 101.86           | 103.65           |
| 2 freeze-thaw cycles Accuracy (%)                    | 99.56            | 101.33           | 101.00           |
| 3 freeze-thaw cycles Accuracy (%)                    | 97.24            | 96.99            | 98.28            |
| 6 h – stability Precision (RSD, %)                   | 2.48             | 3.71             | 4.76             |
| 12 h – stability Precision (RSD, %)                  | 3.01             | 3.22             | 4.06             |
| 24 h – stability Precision (RSD, %)                  | 3.53             | 3.85             | 5.36             |
| 48 h – stability Precision (RSD, %)                  | 3.24             | 3.60             | 6.89             |
| 6 h – stability Accuracy (%)                         | 101.38           | 101.26           | 98.36            |
| 12 h – stability Accuracy (%)                        | 101.99           | 100.83           | 97.25            |
| 24 h – stability Accuracy (%)                        | 102.03           | 99.10            | 98.62            |
| 48 h – stability Accuracy (%)                        | 101.63           | 99.25            | 97.47            |
| 24 h –automatic sampler stability Precision (RSD, %) | 3.85             | 4.10             | 4.44             |
| 48 h –automatic sampler stability Precision (RSD, %) | 5.77             | 8.92             | 7.17             |
| 24 h –automatic sampler stability Accuracy (%)       | 99.69            | 97.01            | 98.34            |
| 48 h –automatic sampler stability Accuracy (%)       | 100.64           | 98.12            | 95.91            |

The calibration curves was  $Y = 0.0303851 + 1.4835 \times X$ ,  $R^2 = 0.9960$ . The lower limit of quantitation of MHO7 was  $0.01 \mu\text{M} \cdot \text{L}^{-1}$ .

**Table S5.** Weight of mice organs in acute toxicity test

| Tissues             | ♀                |                 | ♂                |                  |
|---------------------|------------------|-----------------|------------------|------------------|
|                     | Control          | 2400 mg/kg w    | Control          | 2400 mg/kg w     |
| Body weight         | 33.53 $\pm$ 2.80 | 33.30 $\pm$ 2.1 | 41.38 $\pm$ 2.60 | 38.75 $\pm$ 2.96 |
| Heart               | 0.16 $\pm$ 0.01  | 0.15 $\pm$ 0.01 | 0.18 $\pm$ 0.01  | 0.18 $\pm$ 0.02  |
| Liver               | 1.44 $\pm$ 0.17  | 1.49 $\pm$ 0.09 | 2.40 $\pm$ 0.23  | 2.39 $\pm$ 0.38  |
| spleen              | 0.09 $\pm$ 0.02  | 0.13 $\pm$ 0.05 | 0.10 $\pm$ 0.03  | 0.15 $\pm$ 0.03  |
| lung                | 0.24 $\pm$ 0.03  | 0.22 $\pm$ 0.02 | 0.23 $\pm$ 0.04  | 0.22 $\pm$ 0.03  |
| kidney              | 0.41 $\pm$ 0.04  | 0.46 $\pm$ 0.02 | 0.60 $\pm$ 0.04  | 0.58 $\pm$ 0.06  |
| Reproductive organs | 0.32 $\pm$ 0.12  | 0.21 $\pm$ 0.05 | 0.21 $\pm$ 0.02  | 0.19 $\pm$ 0.02  |
| brain               | 0.43 $\pm$ 0.02  | 0.40 $\pm$ 0.07 | 0.43 $\pm$ 0.04  | 0.42 $\pm$ 0.06  |

**Table S6.** Method validation of MHO7 in plasma

| Concentration (mM)                                   | HQC               | MQC              | LQC              |
|------------------------------------------------------|-------------------|------------------|------------------|
| Inter-day Precision (RSD, %)                         | 2.02              | 2.39             | 3.77             |
| Intra-day Precision (RSD, %)                         | 4.23              | 5.89             | 5.47             |
| Inter-day Accuracy (%)                               | 97.19             | 96.32            | 93.57            |
| Intra-day Accuracy (%)                               | 94.48             | 92.50            | 94.31            |
| Matrix effect (% mean $\pm$ SD)                      | 100.63 $\pm$ 3.84 | 93.13 $\pm$ 5.95 | 90.57 $\pm$ 4.11 |
| Recovery (% mean $\pm$ SD)                           | 90.09 $\pm$ 3.37  | 90.61 $\pm$ 5.01 | 90.27 $\pm$ 3.92 |
| 1 freeze-thaw cycles Precision (RSD, %)              | 1.22              | 2.76             | 1.70             |
| 2 freeze-thaw cycles Precision (RSD, %)              | 2.34              | 3.58             | 4.20             |
| 3 freeze-thaw cycles Precision (RSD, %)              | 3.35              | 4.97             | 3.38             |
| 1 freeze-thaw cycles Accuracy (%)                    | 96.53             | 96.21            | 93.90            |
| 2 freeze-thaw cycles Accuracy (%)                    | 97.41             | 96.30            | 93.57            |
| 3 freeze-thaw cycles Accuracy (%)                    | 97.36             | 95.14            | 93.80            |
| 6 h – stability Precision (RSD, %)                   | 3.89              | 3.10             | 4.52             |
| 12 h – stability Precision (RSD, %)                  | 5.18              | 4.88             | 3.74             |
| 24 h – stability Precision (RSD, %)                  | 4.27              | 4.86             | 6.58             |
| 48 h – stability Precision (RSD, %)                  | 4.07              | 3.53             | 5.72             |
| 6 h – stability Accuracy (%)                         | 94.45             | 92.83            | 92.75            |
| 12 h – stability Accuracy (%)                        | 97.35             | 94.46            | 93.31            |
| 24 h – stability Accuracy (%)                        | 98.92             | 95.81            | 91.95            |
| 48 h – stability Accuracy (%)                        | 95.33             | 96.49            | 94.89            |
| 7 d – stability Precision (RSD, %)                   | 2.81              | 4.34             | 6.74             |
| 15 d – stability Precision (RSD, %)                  | 3.44              | 5.38             | 4.80             |
| 30 d – stability Precision (RSD, %)                  | 2.92              | 4.93             | 3.84             |
| 7 d – stability Accuracy (%)                         | 94.02             | 94.94            | 92.80            |
| 15 d – stability Accuracy (%)                        | 92.48             | 91.18            | 93.51            |
| 30 d – stability Accuracy (%)                        | 93.39             | 94.63            | 94.75            |
| 24 h –automatic sampler stability Precision (RSD, %) | 5.41              | 4.35             | 5.43             |
| 48 h –automatic sampler stability Precision (RSD, %) | 5.73              | 5.68             | 5.94             |
| 24 h –automatic sampler stability Accuracy (%)       | 93.01             | 95.36            | 92.33            |
| 48 h –automatic sampler stability Accuracy (%)       | 91.59             | 93.83            | 93.76            |

The calibration curves was  $Y = 0.0486392 + 1.8329 \cdot X$ ,  $R^2 = 0.9982$ . The lower limit of quantitation of MHO7 was  $0.01 \mu\text{M} \cdot \text{L}^{-1}$ .

**Table S7.** Method validation of MHO7 in tissues

| Concentration (mM)                                   | GI-HQC            | GI-MQC           | GI-LQC           | L-HQC            | L-MQC            | L-LQC            |
|------------------------------------------------------|-------------------|------------------|------------------|------------------|------------------|------------------|
| Inter-day Precision (RSD, %)                         | 4.33              | 6.79             | 6.68             | 4.87             | 4.27             | 4.63             |
| Intra-day Precision (RSD, %)                         | 5.86              | 4.25             | 8.76             | 5.13             | 5.65             | 6.94             |
| Inter-day Accuracy (%)                               | 99.24             | 100.62           | 97.23            | 98.55            | 98.23            | 100.26           |
| Intra-day Accuracy (%)                               | 103.21            | 97.36            | 94.25            | 99.43            | 97.88            | 101.15           |
| Matrix effect (% mean $\pm$ SD)                      | 101.37 $\pm$ 2.36 | 98.35 $\pm$ 3.28 | 96.20 $\pm$ 3.65 | 92.18 $\pm$ 1.58 | 91.42 $\pm$ 2.93 | 90.05 $\pm$ 2.49 |
| Recovery (% mean $\pm$ SD)                           | 94.38 $\pm$ 2.79  | 96.45 $\pm$ 1.64 | 92.81 $\pm$ 2.55 | 92.28 $\pm$ 2.42 | 92.09 $\pm$ 1.07 | 93.97 $\pm$ 3.59 |
| 1 freeze-thaw cycles Precision (RSD, %)              | 3.64              | 4.20             | 3.82             | 4.47             | 3.33             | 4.34             |
| 2 freeze-thaw cycles Precision (RSD, %)              | 5.38              | 3.29             | 6.76             | 1.39             | 2.20             | 3.85             |
| 3 freeze-thaw cycles Precision (RSD, %)              | 5.47              | 7.25             | 7.34             | 1.09             | 3.48             | 3.54             |
| 1 freeze-thaw cycles Accuracy (%)                    | 98.37             | 95.25            | 96.11            | 97.19            | 97.30            | 96.64            |
| 2 freeze-thaw cycles Accuracy (%)                    | 96.73             | 93.26            | 93.16            | 94.31            | 96.59            | 93.76            |
| 3 freeze-thaw cycles Accuracy (%)                    | 95.26             | 92.15            | 91.45            | 95.31            | 94.92            | 94.85            |
| 6 h – stability Precision (RSD, %)                   | 3.14              | 3.99             | 5.70             | 1.55             | 2.32             | 3.91             |
| 12 h – stability Precision (RSD, %)                  | 4.28              | 3.70             | 4.62             | 3.25             | 5.26             | 4.78             |
| 24 h – stability Precision (RSD, %)                  | 3.02              | 3.23             | 4.55             | 3.54             | 3.88             | 5.97             |
| 48 h – stability Precision (RSD, %)                  | 4.21              | 3.58             | 5.64             | 3.02             | 2.09             | 4.21             |
| 6 h – stability Accuracy (%)                         | 96.31             | 98.03            | 95.48            | 97.49            | 98.28            | 98.4             |
| 12 h – stability Accuracy (%)                        | 97.87             | 98.11            | 94.71            | 95.11            | 98.84            | 97.20            |
| 24 h – stability Accuracy (%)                        | 96.52             | 97.38            | 94.41            | 97.48            | 96.60            | 98.08            |
| 48 h – stability Accuracy (%)                        | 97.86             | 97.41            | 95.09            | 95.28            | 94.41            | 97.59            |
| 7 d – stability Precision (RSD, %)                   | 4.23              | 4.47             | 5.01             | 3.19             | 4.21             | 3.81             |
| 15 d – stability Precision (RSD, %)                  | 4.73              | 3.06             | 6.99             | 3.27             | 3.41             | 3.85             |
| 30 d – stability Precision (RSD, %)                  | 3.06              | 4.99             | 5.78             | 4.24             | 1.83             | 4.25             |
| 7 d – stability Accuracy (%)                         | 98.89             | 99.41            | 94.57            | 97.41            | 98.87            | 99.47            |
| 15 d – stability Accuracy (%)                        | 99.43             | 96.64            | 95.27            | 94.30            | 98.54            | 95.84            |
| 30 d – stability Accuracy (%)                        | 99.61             | 95.10            | 94.14            | 93.64            | 96.29            | 95.40            |
| 24 h –automatic sampler stability Precision (RSD, %) | 5.28              | 5.36             | 4.86             | 2.39             | 4.97             | 3.71             |
| 48 h –automatic sampler stability Precision (RSD, %) | 100.11            | 101.93           | 97.52            | 98.55            | 94.97            | 94.26            |
| 24 h –automatic sampler stability Accuracy (%)       | 6.01              | 9.54             | 7.73             | 4.80             | 2.93             | 3.75             |
| 48 h –automatic sampler stability Accuracy (%)       | 94.63             | 95.16            | 96.74            | 95.89            | 95.75            | 94.53            |

GI-HQC, MQC, LQC means the QC of Gastrointestinal contents samples; L-HQC, MQC, LQC means the QC of liver samples. The calibration curves of gastrointestinal contents were  $Y = 0.0540328 + 1.38011 \times X$ ,  $R^2 = 0.9942$  and  $Y = 0.0018527 + 0.72176 \times X$ ,  $R^2 = 0.9903$  for high and low concentrations, respectively, and the lower limit of quantitation of MHO7 was  $0.005 \mu\text{M} \cdot \text{L}^{-1}$ . The calibration curves of liver were  $Y = 0.0608319 + 1.39753 \times X$ ,  $R^2 = 0.9976$  and  $Y = 0.0082588 + 0.26768 \times X$ ,  $R^2 = 0.9971$ . for high and low concentrations, respectively, and the lower limit of quantitation of MHO7 was  $0.005 \mu\text{M} \cdot \text{L}^{-1}$ .

**Table S8** The concentration of MHO7 in mice tissues (n = 6)

| Tissues             | Concentration in different time point ( $\mu\text{g}\cdot\text{g}^{-1}$ ) |           |             |             |           |            |
|---------------------|---------------------------------------------------------------------------|-----------|-------------|-------------|-----------|------------|
|                     | 1h                                                                        | 4h        | 8h          | 12h         | 20h       | 30h        |
| Heart               | 0.06±0.037                                                                | 0.85±0.51 | 0.67±0.48   | 0.64±0.30   | 0.04±0.02 | 0.08±0.01  |
| Liver               | 3.01±1.53                                                                 | 1.64±1.09 | 0.18±0.22   | 0.49±0.37   | 0.06±0.05 | 0.01±0.01  |
| Spleen              | 0.04±0.03                                                                 | 0.43±0.20 | 0.48±0.50   | 0.20±0.14   | 0.31±0.02 | 0.01±0.004 |
| Lung                | 0.43±0.18                                                                 | 1.06±0.45 | 0.82±0.71   | 2.34±1.91   | 0.16±0.04 | 0.08±0.02  |
| Kidney              | 0.11±0.06                                                                 | 1.63±0.92 | 1.66±0.74   | 8.16±6.23   | 0.39±0.09 | 0.07±0.01  |
| Brain               | 0.95±0.80                                                                 | 0.48±0.33 | 0.50±0.15   | 0.18±0.11   | 0.10±0.05 | 0.01±0.004 |
| Muscle              | 0.31±0.22                                                                 | 0.97±0.48 | 0.64±0.37   | 1.42±0.80   | 0.17±0.10 | 0.02±0.003 |
| Reproductive organs | 0.88±0.68                                                                 | 2.29±1.80 | 23.90±11.33 | 13.69±10.29 | 1.46±1.23 | 0.36±0.46  |
| Fat                 | 0.74±0.41                                                                 | 5.20±3.47 | 11.15±8.87  | 0.74±0.70   | 0.34±0.25 | 0.18±0.16  |

**Table S9** The tissue-to-plasma ratio of MHO7 in different time (n = 6)

| Tissues             | Kp value in different time point ( $\mu\text{g}\cdot\text{g}^{-1}$ ) |            |             |             |             |            |
|---------------------|----------------------------------------------------------------------|------------|-------------|-------------|-------------|------------|
|                     | 1h                                                                   | 4h         | 8h          | 12h         | 20h         | 30h        |
| Heart               | 0.31±0.29                                                            | 4.20±3.57  | 0.71±0.62   | 2.02±1.87   | 0.93±0.88   | 3.58±2.98  |
| Liver               | 17.40±12.82                                                          | 5.02±4.70  | 0.18±0.11   | 1.22±1.06   | 1.68±1.21   | 0.32±0.22  |
| Spleen              | 0.28±0.30                                                            | 1.80±1.02  | 0.58±0.44   | 1.11±0.96   | 8.55±6.76   | 0.69±0.58  |
| Lung                | 2.71±1.48                                                            | 4.43±2.87  | 0.72±0.56   | 6.84±4.38   | 4.40±2.51   | 3.54±2.10  |
| Kidney              | 0.68±0.44                                                            | 5.50±3.13  | 1.52±0.93   | 17.24±13.22 | 9.90±7.91   | 3.68±2.13  |
| Brain               | 6.11±3.47                                                            | 1.34±0.53  | 0.52±0.25   | 0.36±0.17   | 2.48±1.51   | 0.57±0.32  |
| Muscle              | 1.95±1.01                                                            | 4.04±2.72  | 0.54±0.36   | 4.20±2.44   | 5.54±3.65   | 0.99±0.55  |
| Reproductive organs | 6.05±4.35                                                            | 11.86±8.16 | 22.58±11.24 | 35.45±15.81 | 30.45±12.78 | 17.62±7.50 |
| Fat                 | 5.44±3.59                                                            | 14.03±5.33 | 9.25±3.69   | 2.33±1.15   | 9.80±6.01   | 9.00±6.96  |

**Table S10.** Significant differet phyla between control and treatment groups (n = 3)

| Species name     | Relative abundance (%) |               |               |                |
|------------------|------------------------|---------------|---------------|----------------|
|                  | Control group          | MHO7-1h group | MHO7-8h group | MHO7-30h group |
| Proteobacteria   | 0.57±0.31              | 0.18±0.045    | 2.05±1.47     | 1.34±1.58      |
| Saccharibacteria | 0.44±0.42              | 0.47±0.28     | 0.35±0.61     | 0.0069±0.0055  |
| Tenericutes      | 0.25±0.20              | 0.46±0.25     | 0.0075±0.0047 | 0.0013±0.0031  |
| Deferribacteres  | 0.14±0.17              | 0.14±0.12     | 0.0044±0.0050 | 0.25±0.23      |

**Table S11.** Significant different classes between control and treatment groups (n = 3)

| Species name     | Relative abundance (%) |               |               |                |
|------------------|------------------------|---------------|---------------|----------------|
|                  | Control group          | MHO7-1h group | MHO7-8h group | MHO7-30h group |
| Clostridia       | 51.23±18.09            | 38.58±11.1    | 28.98±20.11   | 47.82±20.66    |
| Bacilli          | 0.77±0.54              | 10.08±7.69    | 11.49±12.09   | 3.25±3.05      |
| Verrucomicrobiae | 0.0069±0.013           | 0.0019±0.002  | 0.80±1.18     | 2.51±3.67      |
| Mollicutes       | 0.25±0.20              | 0.46±0.25     | 0.0075±0.0048 | 0.0012±0.0031  |

**Table S12.** Significant different orders between control and treatment groups (n = 3)

| Species name       | Relative abundance (%) |               |                 |                 |
|--------------------|------------------------|---------------|-----------------|-----------------|
|                    | Control group          | MHO7-1h group | MHO7-8h group   | MHO7-30h group  |
| Clostridiales      | 51.26±18.06            | 38.54±11.15   | 28.89±20.03     | 47.86±20.61     |
| Lactobacillales    | 0.76±0.53              | 10.10±7.65    | 11.34±12.02     | 3.26±3.04       |
| Verrucomicrobiales | 0.0069±0.012           | 0.0022±0.0027 | 0.78±1.15       | 2.52±3.65       |
| Mollicutes_RF9     | 0.23±0.21              | 0.33±0.16     | 0.0057±0.0040   | 0.0014±0.0025   |
| Anaeroplasmatales  | 0.018±0.032            | 0.12±0.11     | 0.00028±0.00068 | 0.00000         |
| Bacillales         | 0.0013±0.0024          | 0.0000        | 0.071±0.067     | 0.00034±0.00084 |

**Table S13.** Significant different families between control and treatment groups (n = 3)

| Species name              | Relative abundance (%) |               |               |                |
|---------------------------|------------------------|---------------|---------------|----------------|
|                           | Control group          | MHO7-1h group | MHO7-8h group | MHO7-30h group |
| Lachnospiraceae           | 32.11±12.99            | 27.23±10.42   | 21.66±15.88   | 42.58±19.32    |
| Bacteroidales_S24-7_group | 21.90±6.85             | 33.99±6.67    | 33.65±5.47    | 19.34±6.97     |
| Ruminococcaceae           | 17.46±6.16             | 10.04±1.97    | 6.20±4.57     | 4.13±1.97      |
| Lactobacillaceae          | 0.75±0.54              | 10.05±7.69    | 11.34±12.11   | 3.21±2.99      |
| Rikenellaceae             | 8.37±4.69              | 7.09±0.86     | 3.66±2.13     | 3.19±2.16      |
| Verrucomicrobiaceae       | 0.0069±0.013           | 0.0019±0.0021 | 0.80±1.18     | 2.51±3.67      |

**Table S14.** Significant different genera between control and treatment groups (n = 3)

| Species name                          | Relative abundance (%) |               |               |                |
|---------------------------------------|------------------------|---------------|---------------|----------------|
|                                       | Control group          | MHO7-1h group | MHO7-8h group | MHO7-30h group |
| g_norank_f_Bacteroidales_S24-7_group  | 21.9±6.84              | 33.99±6.67    | 33.65±5.47    | 19.34±6.97     |
| g_norank_f_Lachnospiraceae            | 7.89±3.26              | 6.456±2.68    | 7.54±4.66     | 19.81±11.07    |
| Lactobacillus                         | 0.75±0.54              | 10.05±7.69    | 11.34±12.11   | 3.21±2.99      |
| Rikenellaceae_RC9_gut_group           | 4.38±2.38              | 2.82±0.76     | 0.088±0.089   | 0.042±0.084    |
| Prevotellaceae_UCG-001                | 0.74±0.94              | 0.78±0.51     | 4.09±3.41     | 1.07±1.13      |
| Ruminococcus_1                        | 3.24±2.87              | 1.53±1.04     | 0.38±0.32     | 0.071±0.15     |
| Lachnoclostridium                     | 0.58±0.18              | 0.51±0.21     | 0.81±0.61     | 2.42±2.02      |
| Ruminococcaceae_UCG-014               | 1.13±0.51              | 2.73±0.93     | 0.19±0.25     | 0.022±0.030    |
| Ruminiclostridium_9                   | 1.73±0.75              | 0.76±0.29     | 0.60±0.59     | 0.41±0.20      |
| Prevotellaceae_NK3B31_group           | 0.28±0.46              | 0.46±0.31     | 2.54±2.44     | 0.14±0.19      |
| Ruminiclostridium                     | 2.15±1.27              | 0.78±0.59     | 0.36±0.31     | 0.079±0.076    |
| g_norank_f_Ruminococcaceae            | 1.81±1.69              | 0.31±0.22     | 0.31±0.26     | 0.16±0.13      |
| Ruminiclostridium_5                   | 0.66±0.25              | 0.34±0.14     | 0.21±0.21     | 0.27±0.23      |
| [Eubacterium]_coprostanoligenes_group | 0.79±0.40              | 0.13±0.12     | 0.22±0.23     | 0.28±0.50      |
| Coprococcus_1                         | 0.57±0.34              | 0.19±0.10     | 0.21±0.17     | 0.11±0.068     |
| norank_o_Mollicutes_RF9               | 0.23±0.21              | 0.34±0.17     | 0.0075±0.0047 | 0.0012±0.0031  |
| Ruminococcaceae_UCG-010               | 0.32±0.17              | 0.12±0.046    | 0.036±0.042   | 0.0062±0.0061  |
| Ruminococcaceae_UCG-009               | 0.23±0.15              | 0.066±0.050   | 0.063±0.072   | 0.012±0.015    |
| Ruminococcaceae_NK4A214_group         | 0.086±0.053            | 0.076±0.024   | 0.023±0.021   | 0.020±0.023    |
| [Eubacterium]_ventriosum_group        | 0.024±0.019            | 0.13±0.089    | 0.012±0.020   | 0.022±0.041    |
| Anaeroplasma                          | 0.018±0.033            | 0.12±0.11     | 00            | 00             |
| Family_XIII_AD3011_group              | 0.031±0.016            | 0.067±0.041   | 0.0069±0.0077 | 0.021±0.014    |
| g_norank_f_Christensenellaceae        | 0.064±0.027            | 0.034±0.014   | 0.011±0.0079  | 0.0069±0.0087  |
| Sutterella                            | 0.0044±0.0073          | 00            | 0.0069±0.010  | 0.090±0.090    |
| Streptococcus                         | 0.013±0.0081           | 0.023±0.0050  | 0.029±0.016   | 0.0025±0.0031  |
| Staphylococcus                        | 0.0012±0.0031          | 00            | 0.066±0.060   | 00             |
| Peptococcus                           | 0.038±0.030            | 0.010±0.0061  | 0.0050±0.010  | 0.0050±0.0056  |
| Papillibacter                         | 0.019±0.013            | 0.0062±0.0066 | 0.0025±0.0061 | 0.00062±0.0015 |



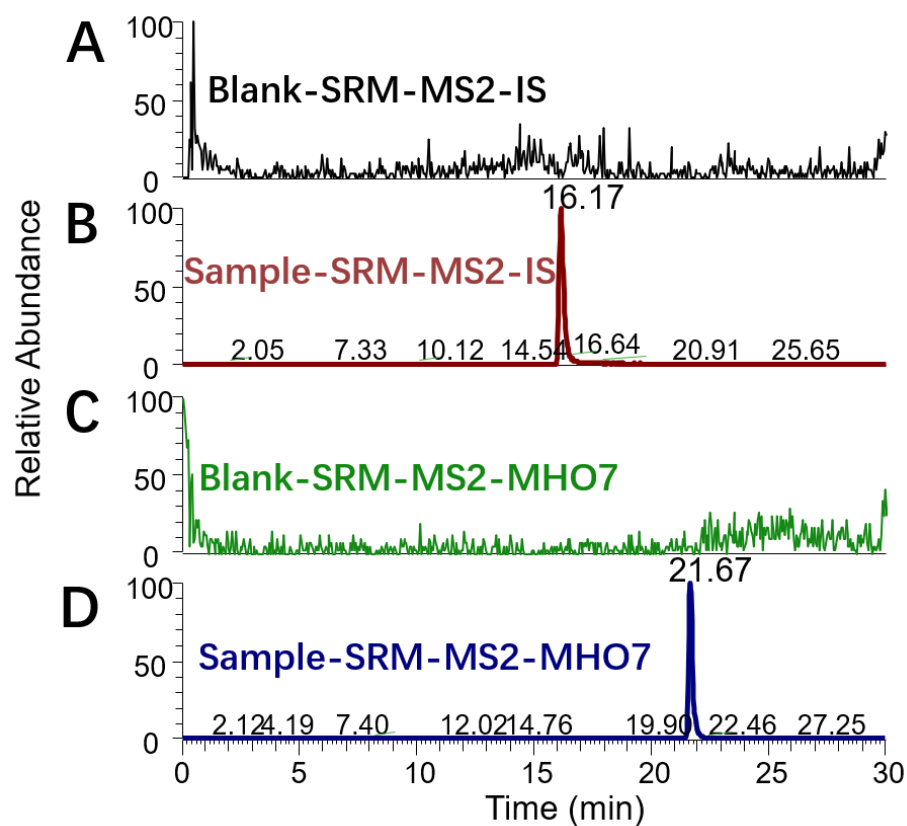

**Figure S1.** Specificity of MHO7 *in vitro* incubation system. (A) MS2 spectrogram of IS in blank SGF of SRM model. (B) MS2 spectrogram of IS in SGF of SRM model. (C) MS2 spectrogram of MHO7 in blank SGF of SRM model. (D) MS2 spectrogram of MHO7 in SGF of SRM model.

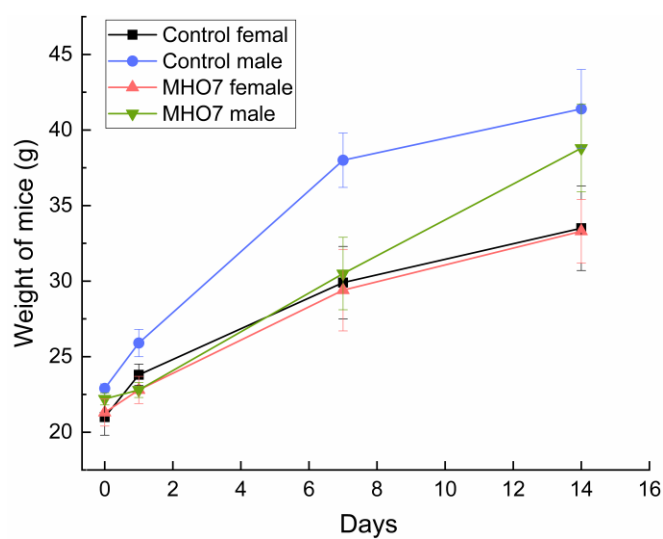

**Figure S2.** Body weight changes of female and male mice within 14 days

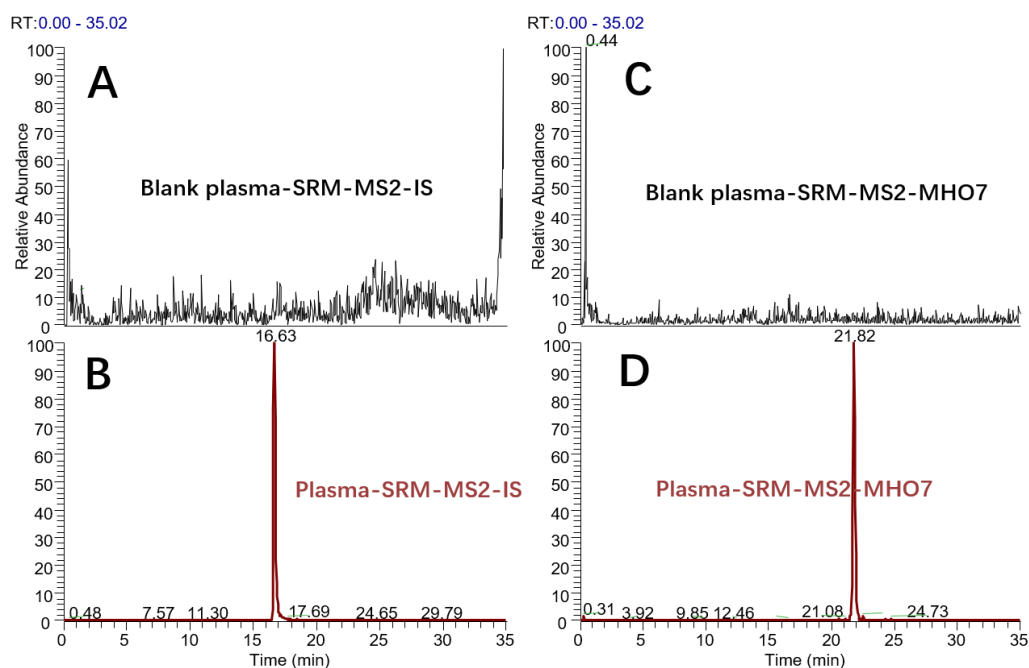

**Figure S3.** Specificity of MHO7 in plasma. (A) MS2 spectrogram of IS in blank plasma of SRM model. (B) MS2 spectrogram of IS in plasma of SRM model. (C) MS2 spectrogram of MHO7 in blank plasma of SRM model. (D) MS2 spectrogram of MHO7 in plasma of SRM model.

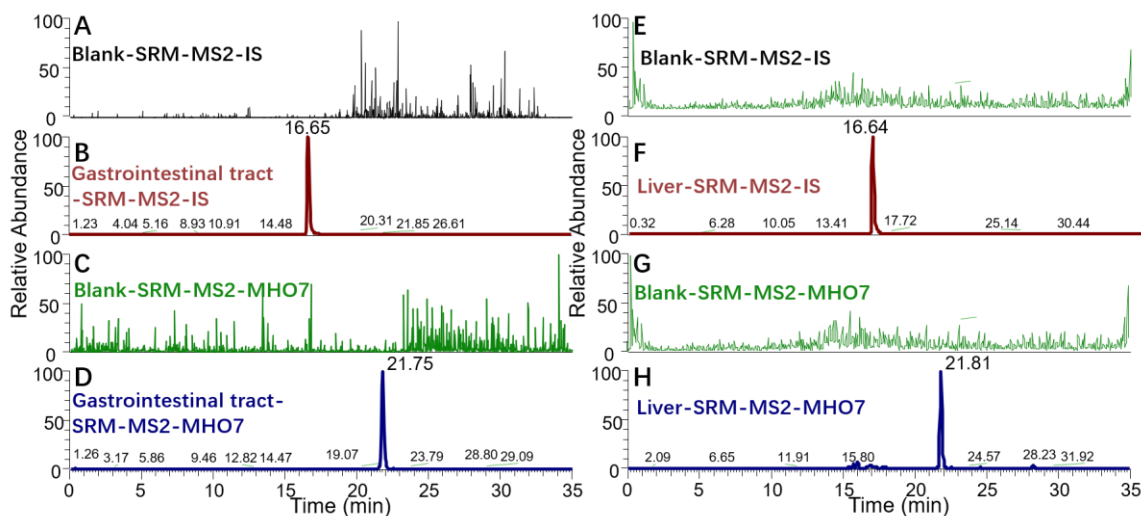

**Figure S4.** Specificity of MHO7 in tissues. (A) MS2 spectrogram of IS in blank gastrointestinal contents of SRM model. (B) MS2 spectrogram of IS in gastrointestinal contents of SRM model. (C) MS2 spectrogram of MHO7 in blank gastrointestinal contents of SRM model. (D) MS2 spectrogram of MHO7 in gastrointestinal contents of SRM model. (E) MS2 spectrogram of IS in blank liver of SRM model. (F) MS2 spectrogram of IS in liver of SRM model. (G) MS2 spectrogram of MHO7 in blank liver of SRM model. (H) MS2 spectrogram of MHO7 in liver of SRM model.

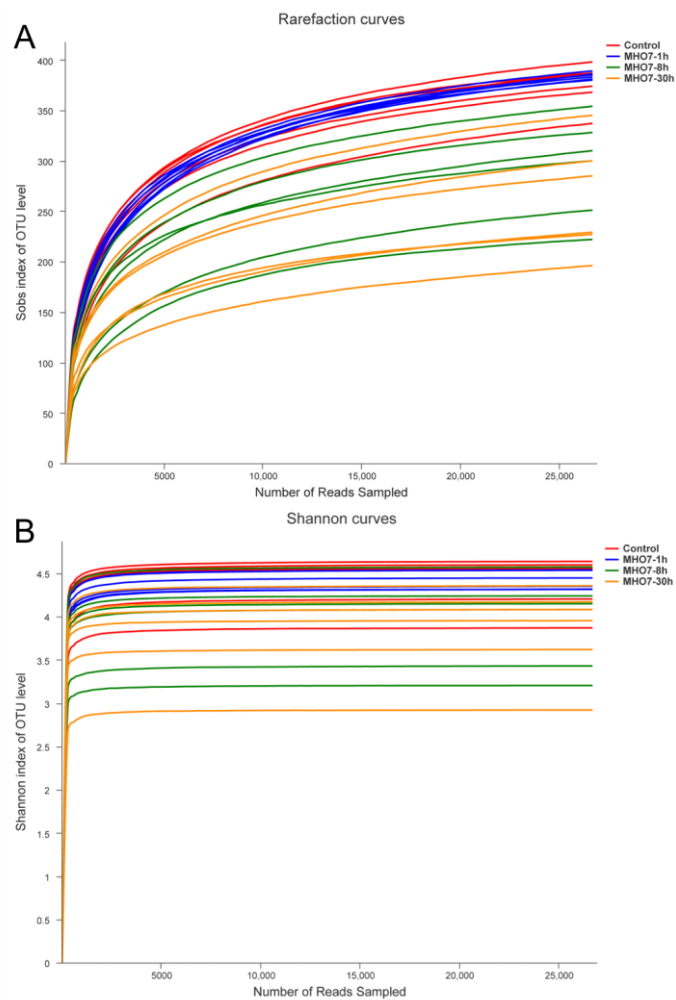

**Figure S5.** Rarefaction and Shannon index curves of OTU level. (A) Rarefaction curves of OTU level. (B) Shannon curves of OTU level.

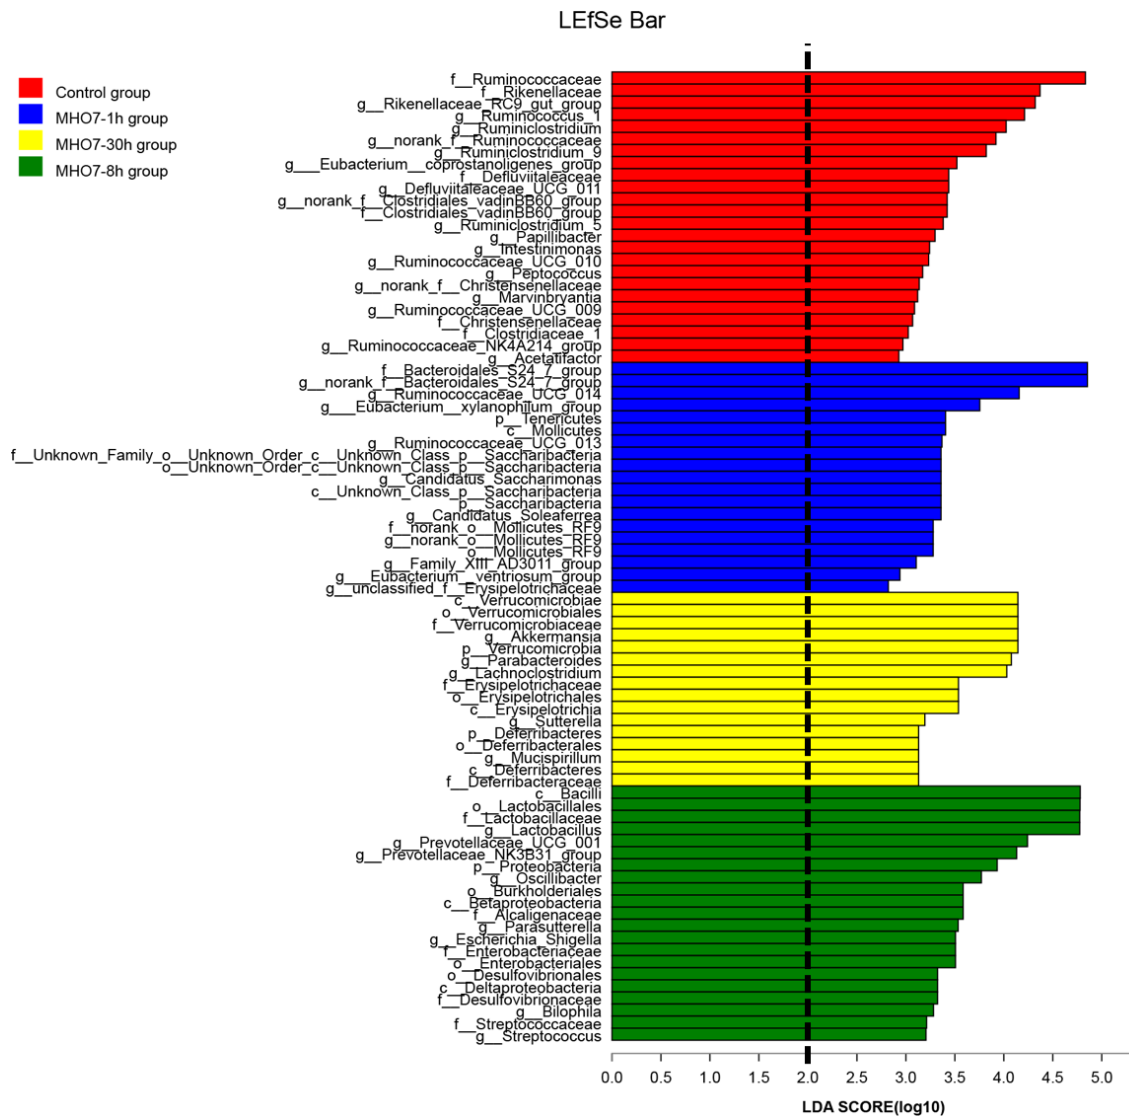

**Figure S6.** LDA score by Linear Discriminant Analysis (LDA) Effect Size (LefSe) analysis

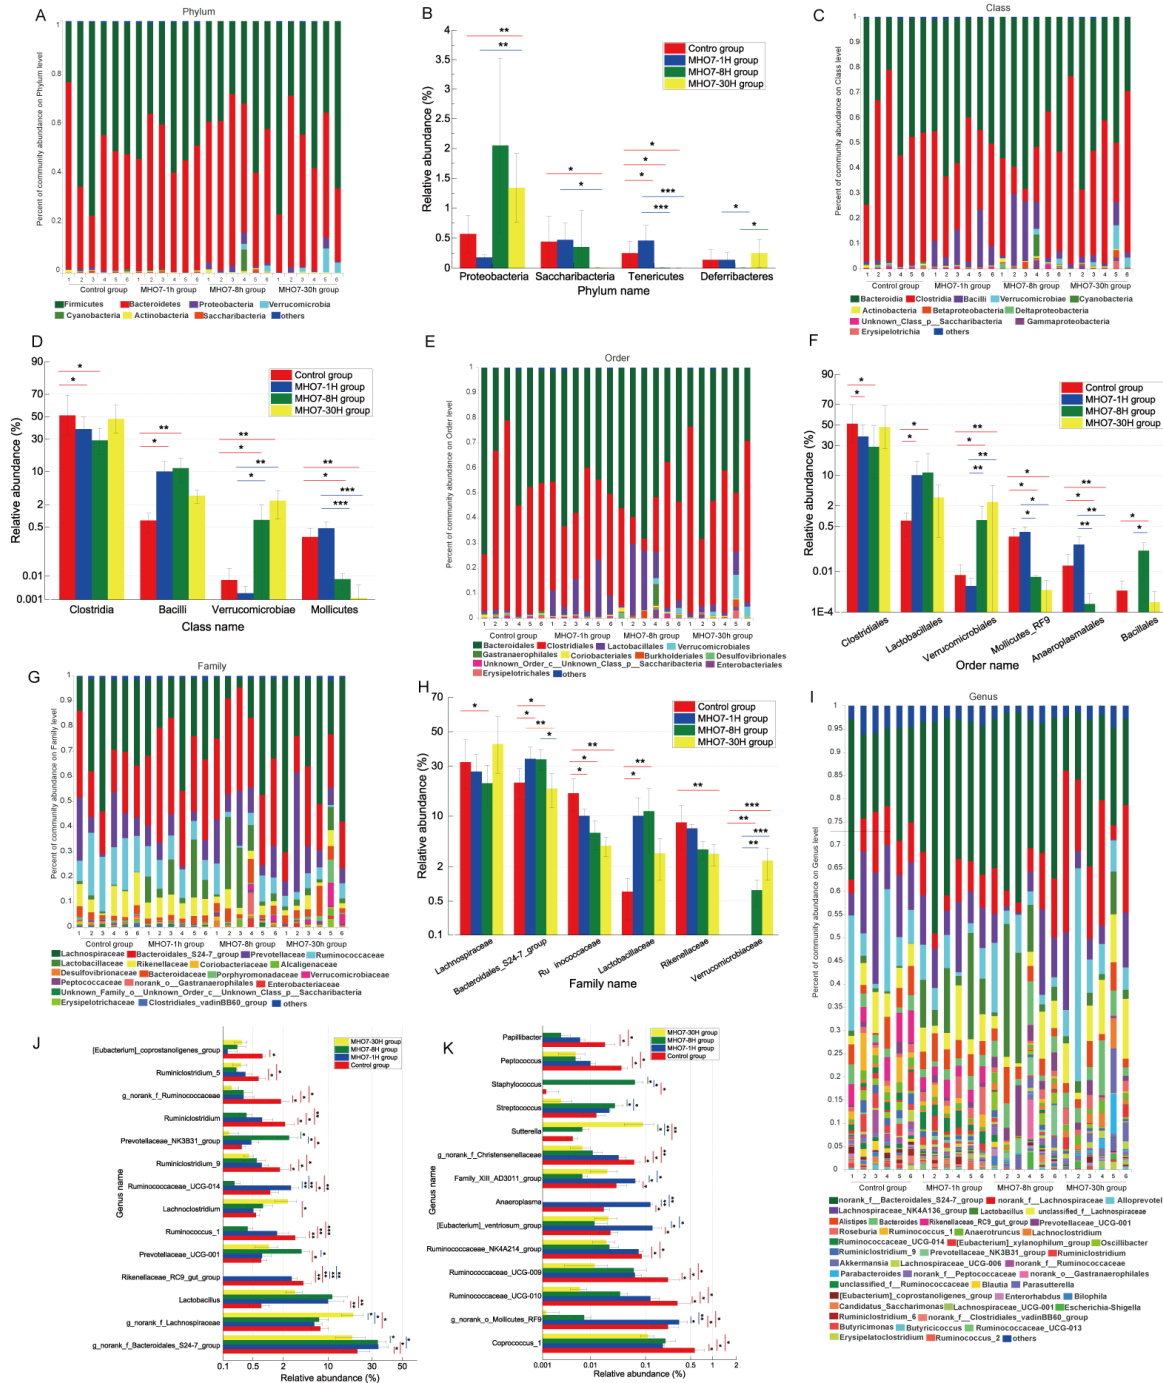

**Figure S7.** MHO7 modulated the composition of gut microbiota at the different taxonomic levels (n = 6 per group). The distributions of the microbial communities in mice at phylum (A), class (C), order (E), family (G) and genus (I) taxonomic level and the relative abundance of the significant bacterial detected in faecal samples at phylum (B), class (D), order (F), family (H) and genus (J, K) taxonomic level.
